# Supplementary material for: Magnetically transportable core–shell emulsion droplets with an antioxidative all-organic paramagnetic liquid shell
Source: Royal Society of Chemistry journal article supplement (doi:10.1039/c4tb00546e), 2014-01-01
Supplement: c4tb00546e1.pdf [file c4tb00546e1.pdf]

## Electronic Supplementary Information

### Magnetically-Transportable Core-Shell Emulsion Droplets with Antioxidative All-Organic Paramagnetic Liquid Shell

*Y. Uchida,\* Y. Iwai, T. Akita, T. Mitome, K. Suzuki, R. Tamura, N. Nishiyama*

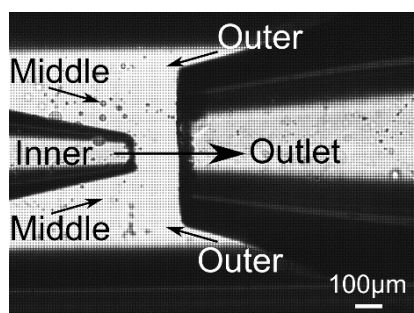

**Fig. S1.** Microphotograph of microfluidic device I.

**Movie S1.** Double emulsion droplets with paramagnetic liquid shells are attracted by a permanent magnet (0.5 T).
